# Supplementary material for: CREBB repression of protein synthesis in mushroom body gates long-term memory formation in Drosophila
Source: PubMed Central journal article supplement — Proc Natl Acad Sci U S A. 2022 Dec 5;119(50):e2211308119. doi: 10.1073/pnas.2211308119 (PMC9897441; doi:10.1073/pnas.2211308119), 2022-12-05
Supplement: pnas.2211308119.sapp.pdf [file pnas.2211308119.sapp.pdf]

1 Supplementary Information for

2 **CREBB repression of protein synthesis in mushroom body gates long-**  
3 **term memory formation in *Drosophila***

4 Hsuan-Wen Lin<sup>a,1</sup>, Chun-Chao Chen<sup>a,1,2</sup>, Ruei-Yu Jhang<sup>a,b</sup>, Linyi Chen<sup>a,b</sup>, J. Steven de  
5 Belle<sup>a,c,d,e,f</sup>, Tim Tully<sup>a</sup> and Ann-Shyn Chiang<sup>a,g,h,i,j,k,2</sup>

6 <sup>a</sup>Brain Research Center, National Tsing Hua University, Hsinchu 30013, Taiwan;

7 <sup>b</sup>Institute of Systems Neuroscience and Department of Life Science, National Tsing Hua  
8 University, Hsinchu 30013, Taiwan;

9 <sup>c</sup>School of Life Sciences, Arizona State University, Tempe, AZ 85281;

10 <sup>d</sup>Department of Psychological Sciences, University of San Diego, San Diego, CA 92110;

11 <sup>e</sup>School of Life Sciences, University of Nevada, Las Vegas, NV 89154;

12 <sup>f</sup>MnemOdyssey LLC, Escondido, CA 92027;

13 <sup>g</sup>Institute of Systems Neuroscience and Department of Life Science, National Tsing Hua  
14 University, Hsinchu 30013, Taiwan

15 <sup>h</sup>Department of Biomedical Science and Environmental Biology, Kaohsiung Medical  
16 University, Kaohsiung 80708, Taiwan

17 <sup>i</sup>Institute of Molecular and Genomic Medicine, National Health Research Institutes,  
18 Zhunan 35053, Taiwan

19 <sup>j</sup>Graduate Institute of Clinical Medical Science, China Medical University, Taichung  
20 40402, Taiwan;

21 <sup>k</sup>Kavli Institute for Brain and Mind, University of California at San Diego, La Jolla, CA

22 92093-0526, USA

23 <sup>1</sup>H.-W.L. and C.-C.C. contributed equally to this work.

24 <sup>2</sup>Correspondence: [chenchunchao@gapp.nthu.edu.tw](mailto:chenchunchao@gapp.nthu.edu.tw) or [aschiang@life.nthu.edu.tw](mailto:aschiang@life.nthu.edu.tw)

25 **This PDF file includes:**

26 Supplementary text

27 Figures S1 to S6

28 Tables S1 to S2

29 SI References

30

## 31 **Materials and Methods**

32 In this report we used an automated olfactory aversive learning task (1) and assessed LTM  
33 after RNAi knockdown or expression of transgenes in these temporally and spatially  
34 restricted domains to identify the subsets of neurons critical for this task. We evaluated  
35 training-responsive CREBB or 5-HT1A expression with confocal microscopy using a  
36 *Gal4*-targeted UV-sensitive KAEDE reporter system (2). In various experiments, flies  
37 were fed CXM to provide a systemic level of protein synthesis inhibition.

## 38 **Fly Strains**

39 Fly stocks were maintained on standard corn meal/yeast/agar medium at  $25 \pm 1$  °C or  $18 \pm$   
40  $1$  °C and 70% relative humidity on a 12:12-h light:dark cycle. All genotypes and sources  
41 are listed in *SI Appendix*, Table S2.

## 42 **Behavior**

43 Olfactory associative learning was evaluated by training 6- to 7-day-old flies in a T-maze  
44 apparatus with a Pavlovian olfactory conditioning procedure (3) as described previously  
45 (2, 4, 5). All experiments were conducted in the dark in an environment-controlled room  
46 at the required temperatures and 70% relative humidity during ZT4 – 8 (10:00 AM – 14:00  
47 PM). The odors used were 3-octanol (OCT) and 4-methylcyclohexanol (MCH). Each  
48 experiment consisted of two groups of approximately 100 flies, each of which was  
49 conditioned with one of the two odors. Flies were exposed sequentially to two odors that  
50 were carried through the training chamber in a current of air (odors were bubbled at 750  
51 ml/min). In a single training session, flies first were exposed for 60 s to the conditioned  
52 stimulus (CS<sup>+</sup>), during which time they received the unconditioned stimulus (US), which  
53 consisted of 12 1.5-s pulses of 60 V dc electric shock presented at 5-s interpulse intervals.

54 After the presentation of the CS<sup>+</sup> condition, the chamber was flushed with fresh air for 45  
55 s. Then flies were exposed for 60 s to the unpaired CS<sup>-</sup>. To evaluate memory retention  
56 immediately after single-session training (acquisition), flies were gently tapped into an  
57 elevator-like compartment immediately after training. After 90 s, the flies were transported  
58 to the choice point of a T-maze, in which they were exposed to two converging currents of  
59 air (one carrying OCT, the other MCH) from opposite arms of the maze. Flies were free to  
60 choose between and walk toward the CS<sup>+</sup> and CS<sup>-</sup> for 120 s, at which time they were  
61 trapped inside the respective arms of the T-maze (by sliding the elevator out of the register),  
62 anesthetized and counted. Flies that chose to avoid the CS<sup>+</sup> ran into the T-maze arm  
63 containing the CS<sup>-</sup>, whereas flies that chose to avoid the CS<sup>-</sup> ran into the arm containing  
64 the CS<sup>+</sup>. For each experiment, a performance index  $(PI_{1,2}) = (N_{CS^-} - N_{CS^+}) / (N_{CS^-} + N_{CS^+})$   
65 was calculated and averaged over these two complementary experiments, with the final PI  
66  $= (PI_1 + PI_2) / 2$ . Averaging of the two reciprocal scores eliminated any potential biases  
67 originating from the machine, naïve odor preferences, or non-associative changes in  
68 olfaction. For 24-h memory experiments, flies were subjected to single-session training,  
69 training massed together without rest, or training spaced out with 15-min rest intervals. For  
70 these training protocols, robotic trainers were used. All genotypes were trained and tested  
71 in parallel and rotated among all of the robotic trainers to ensure a balanced experiment.  
72 The genetic backgrounds of all fly strains were equilibrated to the “Canton” wild-type  
73 background by five or more generations of backcrossing. In *tub-Gal80<sup>ts</sup>* experiments, flies  
74 raised at 18 °C were transferred to 30 °C for at least five days before the experiments.

## 75 **Pharmacological treatment**

76 To block protein synthesis, flies were fed 35 mM cycloheximide (Sigma) in 5% glucose 1  
77 day before training until immediately before the test (1).

### 78 ***crebB* and 5-*HT1A* promoter constructs**

79 To engineer the 5-*HT1A* promoter construct, polymerase chain reaction (PCR) was  
80 performed using genomic DNA from the wild-type *Canton-S w<sup>1118</sup>* (iso1CJ) fly line as the  
81 template together with the forward primer  
82 5'AGTGACGGCCGTATTTGATGCTCGACATGGC 3' and the reverse primer  
83 5'AGTGAGGTACCTTTGTGGATACTCGGTGTGTTTTTTT 3'. A 5.2-kb PCR product  
84 was generated and inserted into the TA vector. Subsequent sub-cloning was performed to  
85 insert the 5.2-kb promoter region into a specific insertion vector, pBPGAL4.2Uw-2, via  
86 *AatII* (5') and *KpnI* sites (3'). The promoter construct was injected into *attP<sup>40</sup>*-containing  
87 fly strains to obtain the transgenic fly lines. To engineer the *creb2* promoter construct,  
88 polymerase chain reaction (PCR) was performed using genomic DNA from the wild-type  
89 *Canton-S w<sup>1118</sup>* (iso1CJ) fly line as the template together with the forward primer  
90 5'GAAAAGTGCCACCTGCTGCATGTCTACCAACAGTTCGAG 3' and the reverse  
91 primer 5'CCGGATCTGCTAGCGGTTCCAGCTGCTGTCTGTATGAC 3'. A 11.6-kb  
92 PCR product was generated and inserted into the pBPGAL4.2Uw-2 vector which was  
93 digested with *AatII* and *KpnI* using In-Fusion® cloning system (Clontech). The promoter  
94 construct was injected into *attP<sup>40</sup>*-containing fly strains to obtain the transgenic fly lines.

### 95 **KAEDE measurement**

96 KAEDE is a photoconvertible green fluorescent protein, irreversibly changing its structure  
97 to a red fluorescent protein upon ultraviolet irradiation (6). Taking advantage of circadian  
98 transcription and protein synthesis in the lateral clock neurons, we previously validated *de*

99 *novo* KAEDE synthesis in *per-Gal4>UAS-kaede* flies, in which it faithfully reports the  
100 cyclic transcriptions of the *period* gene. Feeding cycloheximide also suppressed green  
101 KAEDE synthesis, while not affecting the already-converted red KAEDE (2). To measure  
102 the amount of newly synthesised KAEDE in MB neurons, we used procedures adapted  
103 from a previous study (2). Briefly, pre-existing KAEDE proteins were photoconverted into  
104 red fluorescent proteins by 365–395 nm UV irradiation generated from a 120-W mercury  
105 lamp. For behavioral testing, approximately 15–20 flies kept in a clear plastic syringe were  
106 directly exposed to UV light at a distance of 5 cm for 1 h. Individual neurons expressing  
107 KAEDE were directly visualized through an open window in the fly’s head capsule. Living  
108 samples were used because the signal-to-noise ratio of green to red KAEDE is greatly  
109 reduced after chemical fixation. KAEDE neurons were located in less than 5 s by a fast  
110 pre-scanning of red KAEDE excited by a 561-nm laser, to avoid unnecessary fluorescence  
111 quenching of green KAEDE during repeated scanning. A single optical slice through the  
112 MB  $\alpha$ -lobe tip was imaged at a resolution of 1024×1024 pixels under a confocal  
113 microscope with a 40× C-Apochromat water-immersion objective lens (N.A. value 1.2,  
114 working distance 220  $\mu$ m). All brain samples in the experiment were imaged with the same  
115 optical settings maximized for green and red KAEDE immediately before and after  
116 photoconversion, respectively. In all cases, both green KAEDE (excited by a 488-nm laser)  
117 and red KAEDE (excited by a 561-nm laser) were measured. By using the amount of red  
118 KAEDE as an internal standard to calibrate individual variation, we calculated the rate of  
119 increase in green KAEDE synthesis after photoconversion with the formula  $(\Delta F) = \% (F_{t_1}$   
120  $- \text{average } F_{t_0}) / \text{average } F_{t_0}$ , where  $F_{t_1}$  and  $F_{t_0}$  are the ratios of the averaged intensities of  
121 green (G) to red (R) KAEDE ( $G_{t_0}/R_{t_0}$ ) immediately after photoconversion ( $t_0$ ) and at a later  
122 specific time point ( $t_1$ ), respectively.

123 **Immunohistochemistry**

124 Brains were dissected in phosphate-buffered saline (PBS), fixed with a commercial  
125 microwave oven (2,450 MHz, 1100 Watts) in 4% paraformaldehyde on ice for 60 s three  
126 times, and then immersed in 4% paraformaldehyde with 0.25% Triton X-100 for 60 s three  
127 times. After being washed in PBS for 10 min at room temperature, brain samples were  
128 incubated in PBS containing 2% Triton X-100 (PBS-T) and 10% normal goat serum, and  
129 then degassed in a vacuum chamber to expel tracheal air for four cycles (depressurizing to  
130  $-70$  mmHg and then holding for 10 min). Next, brain samples were blocked and penetrated  
131 in PBS-T at 4 °C overnight, and then incubated in PBS-T containing 1:40 mouse 4F3 anti-  
132 DLG antibody (Developmental Studies Hybridoma Bank, University of Iowa) to label Disc  
133 large proteins at 4 °C for 1 day. Samples were subsequently washed in PBS-T three times  
134 and incubated in PBS-T containing 1:200 biotinylated goat anti-mouse IgG (Molecular  
135 Probes) as the secondary antibody at 25 °C for 1 day. Brain samples were then washed and  
136 incubated with 1:500 Alexa Fluor 635 streptavidin (Molecular Probes) at 25 °C for 1 day.  
137 Finally, after extensive washing, immunolabeled brain samples were directly cleared for 5  
138 min in *FocusClear*, an aqueous solution that renders biological tissue transparent (7), and  
139 mounted between two cover slips separated by a spacer ring with a thickness of  $\sim 200$   $\mu\text{m}$ .  
140 Sample brains were imaged under a Zeiss LSM 780 or 880 confocal microscope with a  
141 40 $\times$  C-Apochromat water-immersion objective lens (N.A. value 1.2, working distance 220  
142  $\mu\text{m}$ ).

143

144 **Statistics**

145 Raw data were analyzed parametrically with SigmaPlot 10.0 and SigmaStat 3.5 statistical  
146 software. All the data including the behavior Performance Index (PI) or KAEDE image  
147 ( $\Delta F$ ) were evaluated via unpaired *t*-test (two groups) or one-way analysis of variance  
148 (ANOVA) (> two groups). Data were evaluated with the Mann-Whitney Rank Sum Test in  
149 cases of unequal variances. Data in all figures are presented as the mean  $\pm$  SE. Experiments  
150 were replicated using multiple *Gal4* drivers with equivalent expression patterns, and  
151 multiple effector genes and reagents that impact shared cellular functions.



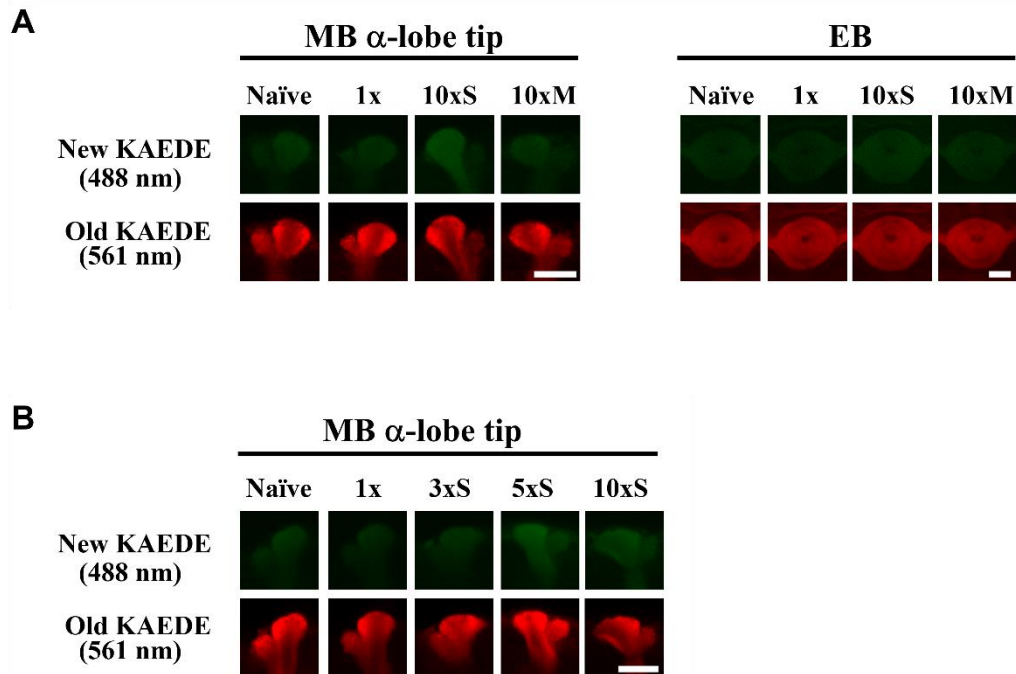

152

153 **SI Appendix Fig. S1.** Representative images of new KAEDE synthesis in response to  
 154 different learning protocols. Spaced training activates *crebB* transcription in the  
 155 MB- $\alpha$  lobe tip. (A) *crebB* promoter activity reported by *de novo* KAEDE synthesis after  
 156 1x, 10xS and 10xM training compared to naïve control flies, estimated by the ratio of new  
 157 (green, 488 nm) and preexisting (red, 561 nm) proteins ( $\% \Delta F / \bar{F}_0$ ). For each brain, single  
 158 optical slices through the MB  $\alpha$ -lobe tip or ellipsoid body (EB) were imaged under  
 159 identical conditions. (B) *de novo* KAEDE synthesis after 1x, 3xS, 5xS and 10xS training  
 160 compared to naïve control flies. A minimum of 5xS training cycles are necessary to observe  
 161 KAEDE synthesis reflecting *crebB* activity. Scale bar = 10  $\mu$ m. Flies carry the same  
 162 transgenes as in **Fig. 1B**.

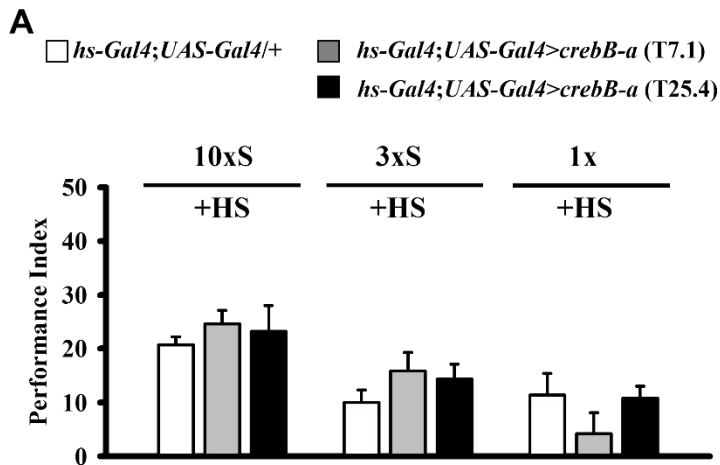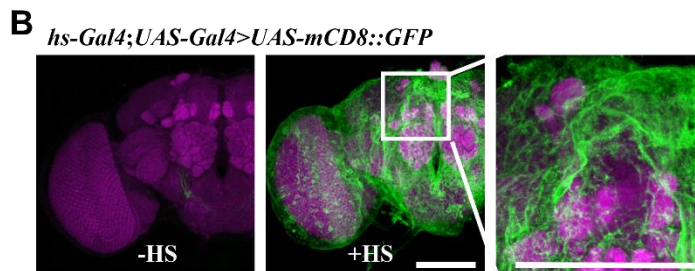

163

164 **SI Appendix Fig. S2.** Effects of *hs-Gal4>UAS-crebB-a* expression on 1-day memory  
 165 formation. (A) Over-expressing two independent lines (T7.1 and T25.4) of *crebB-a* with  
 166 heat-shock induced Gal4 did not affect 1-day memory after 10xS or 3xS, or 1x training. (B)  
 167 In *hs-Gal4>UAS-GFP* flies, heat-shock induced Gal4 drives GFP expression at low level  
 168 in the MB neurons. All brains were counterstained for DLG (magenta). Scale bar = 50  $\mu$ m.

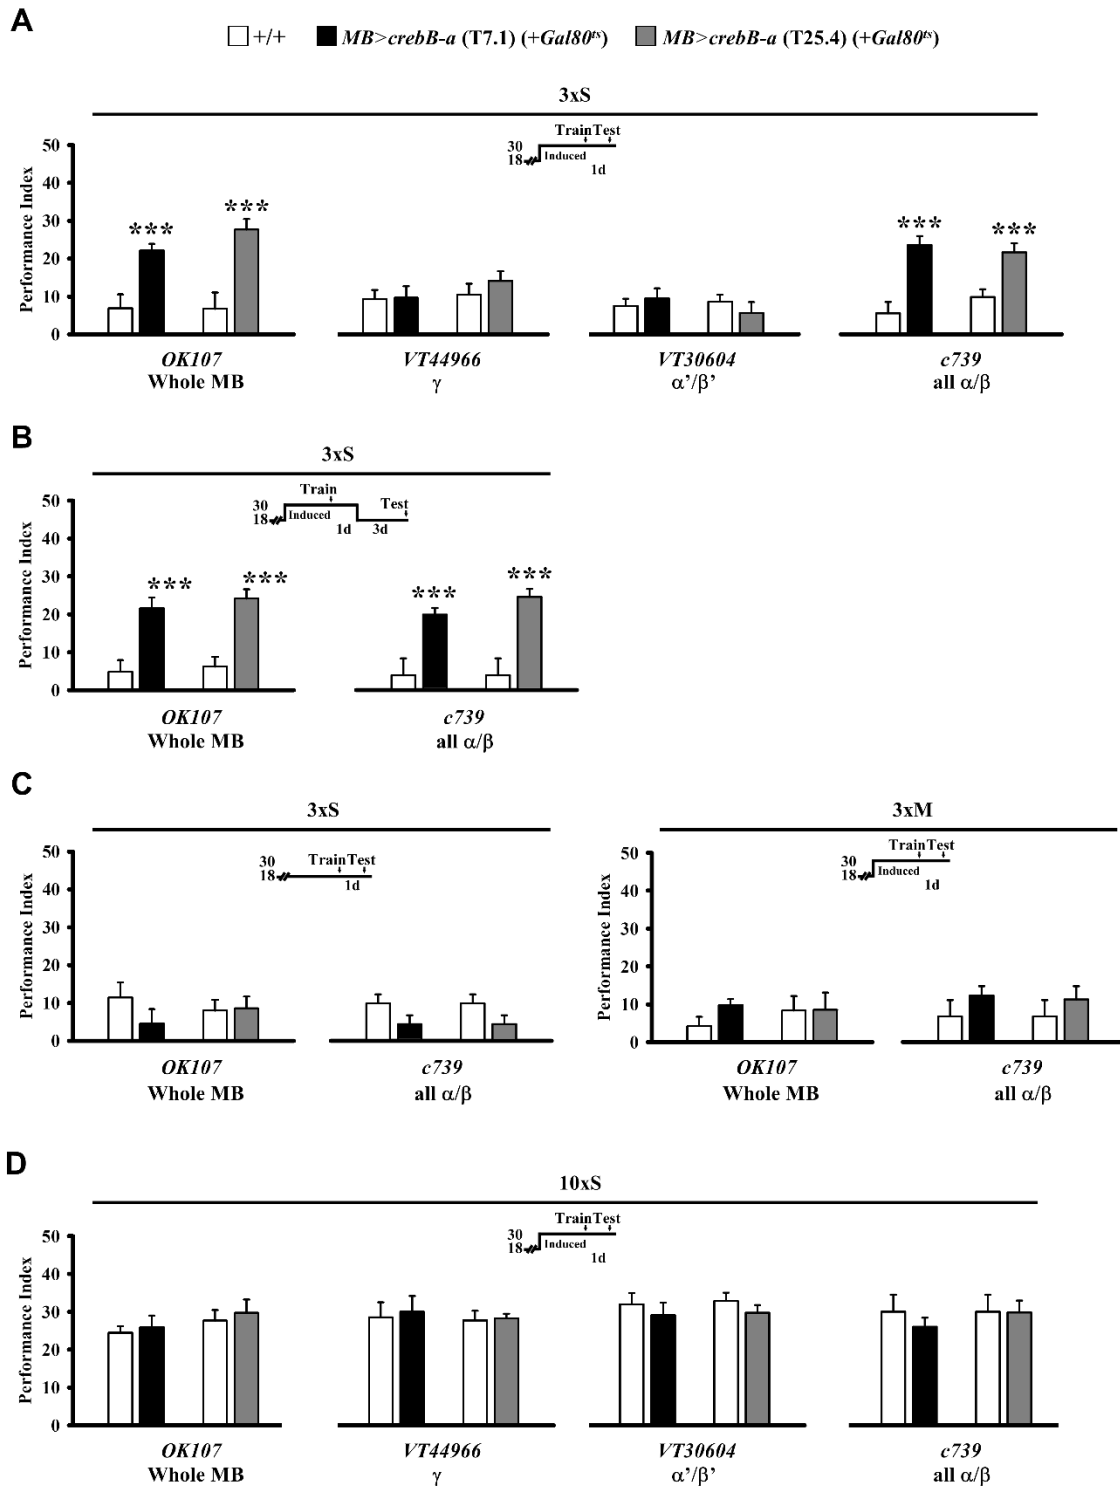

169

170 **SI Appendix Fig. S3.** Effects of over-expressing CREBB-a in subsets of MB neurons on

171 1-day memory formation. (A) Effects of adult-stage specific overexpressing *crebB-a* (with

172 two independent lines) in whole MB,  $\gamma$ ,  $\alpha'/\beta'$ , or  $\alpha/\beta$  neurons on LTM formation after 3xS.  
173 *Gal4*-targeted transgene overexpression is induced at the restrictive temperature for *tub-*  
174 *Gal80<sup>ts</sup>* (30 °C) from at least five days before training until testing. (B) The enhanced  
175 memory after 3xS lasted at least 4 days. (C) Memory is unaffected in these flies held at the  
176 permissive temperature for *tub-Gal80<sup>ts</sup>* (18 °C) after 3xS (left) and at 30 °C after 3xM  
177 (right). (D) One-day memory is also unaffected in these flies at 30 °C after 10xS.

**A**

□ +/+    ■ *VT9843>crebB-x (+Gal80<sup>ts</sup>)*  
 ▨ *VT0110>crebB-x (+Gal80<sup>ts</sup>)*  
 ■ *VT26665>crebB-x (+Gal80<sup>ts</sup>)*

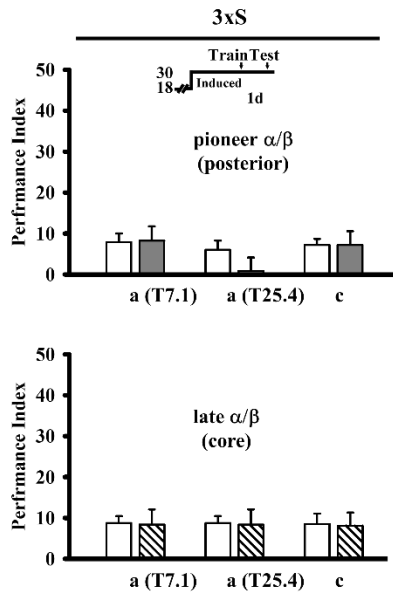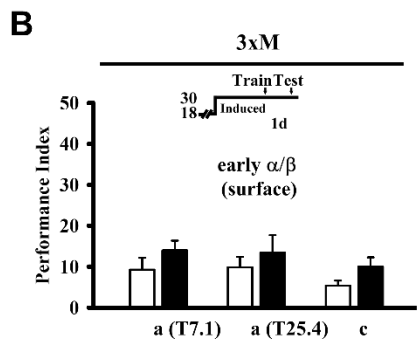

178

179 **SI Appendix Fig. S4.** Effects of over-expressing CREBB-a and -c in subpopulations of  
 180  $\alpha/\beta$  MB neurons on 1-day memory formation. (A) Overexpressing CREBB-a (with two  
 181 independent lines: T7.1 or T25.4) or CREBB-c in pioneer or late  $\alpha/\beta$  neurons does not  
 182 affect 1-day memory after 3xS. *Gal4*-targeted transgenes overexpression is induced at the  
 183 restrictive temperature for *tub-Gal80<sup>ts</sup>* (30 °C) from five days before training until testing.  
 184 (B) Overexpressing these transgenes in early  $\alpha/\beta$  neurons does not affect 1-day memory  
 185 after 3xM.

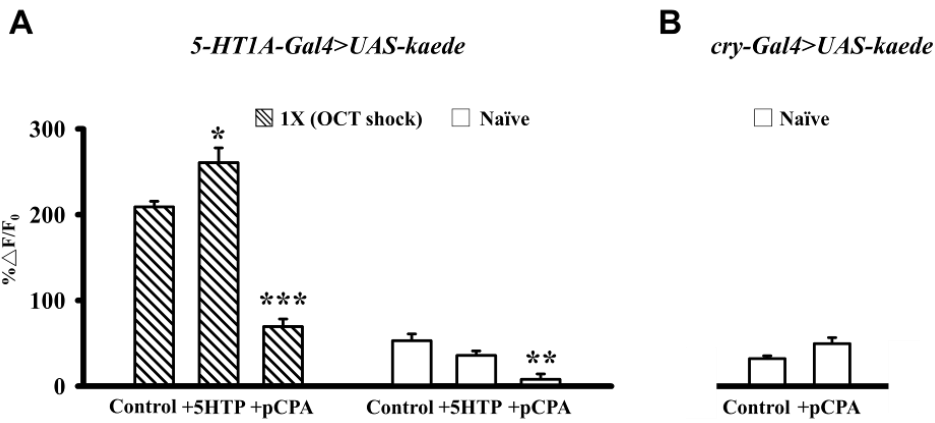

187 **SI Appendix Fig. S5.** Activation of the *5-HT1A* gene is regulate by serotonin level. (A) 5-  
 188 *HT1A* promoter activity in the MB  $\alpha$ -lobe tip 24 h after no training (naïve) or 1x in flies  
 189 fed 5% glucose alone (control) or with 5HTP to increase 5HT, or pCPA to decrease 5HT.  
 190 (B) *cry* promoter activity in MB  $\alpha$ -lobe tip of naïve flies fed 5% glucose alone (control) or  
 191 pCPA.

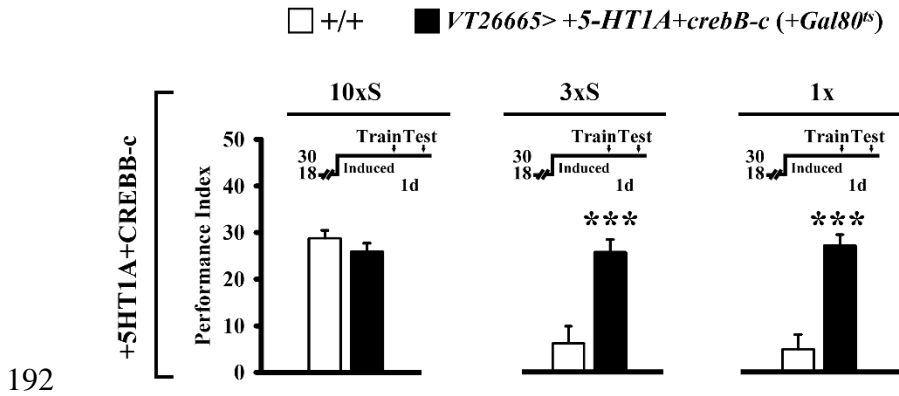

193 **SI Appendix Fig. S6.** CREBB is sufficient to fully rescue LTM impairment caused by  
 194 over-expressing 5-HT1A. Co-overexpressing 5-HT1A and CREBB-c proteins in early  $\alpha/\beta$   
 195 neurons does not impair 1-day memory after 10xS (left), but enhances 1-day memory after  
 196 3xS (center) or 1x (right). *Gal4*-targeted 5-HT1A and CREBB-c overexpression is induced  
 197 by relieving *tub-Gal80<sup>ts</sup>* inhibition at the restrictive temperature (30 °C) from five days  
 198 before training until testing.

199 **SI Appendix Table S1.** Total number of MB neurons containing in specific *MB-Gal4* lines  
200 in each hemisphere

| <b><i>Gal4</i> driver</b>                     | <b>Number of neurons</b> |
|-----------------------------------------------|--------------------------|
| <i>5-HT1A</i> (early $\alpha/\beta$ neurons)  | 421 $\pm$ 21 (N = 4)     |
| <i>VT26665</i> (early $\alpha/\beta$ neurons) | 482 $\pm$ 12 (N = 4)     |
| <i>VT26665</i> + <i>5-HT1A</i>                | 495 $\pm$ 11 (N = 4)     |
| <i>G0391</i> (early $\alpha/\beta$ neurons)   | 478 $\pm$ 32 (N = 7)     |
| <i>OK107</i> (whole MB neurons)               | 2316 $\pm$ 181 (N = 8)   |

201 The number of GFP-labeled nuclei in the MB was determined by the total count in *MB-*  
202 *Gal4>UAS-GFP::lacZ.nls* flies. Each nucleus was manually marked with a landmark  
203 sphere in Amira software, and the total number of spheres was automatically determined.  
204 Values are means  $\pm$  SEM.



## SI Appendix Table S2. Reagents and Genotypes.

| Reagent or Fly Genotypes                                               |                                                                                                            | Source                                                   | Identifier              |
|------------------------------------------------------------------------|------------------------------------------------------------------------------------------------------------|----------------------------------------------------------|-------------------------|
| <b>Antibodies</b>                                                      |                                                                                                            |                                                          |                         |
| Mouse 4F3 anti-DLG antibody                                            |                                                                                                            | Developmental Studies Hybridoma Bank, University of Iowa | RRID: AB_528203         |
| Goat anti-Mouse IgG (H+L) Cross-Adsorbed Secondary antibody, Biotin-XX |                                                                                                            | Molecular Probes                                         | Catalog #: B-2763       |
| Streptavidin, Alexa Fluor™ 635 conjugate                               |                                                                                                            | Molecular Probes                                         | Catalog #: S32364       |
| <b>Chemicals</b>                                                       |                                                                                                            |                                                          |                         |
| Mineral Oil                                                            |                                                                                                            | Fisher Scientific                                        | Catalog #: O122         |
| 4-methylcyclohexanol (98%)                                             |                                                                                                            | Sigma-Aldrich                                            | Catalog #: 153095       |
| 3-octanol (99%)                                                        |                                                                                                            | Sigma-Aldrich                                            | Catalog #: 218405       |
| Glucose                                                                |                                                                                                            | Fisher Scientific                                        | Catalog #: D16          |
| Cycloheximide (CXM)                                                    |                                                                                                            | Sigma-Aldrich                                            | Catalog #: 01810        |
| L-5-hydroxytryptophan (5HTP)                                           |                                                                                                            | Alfa Aesar                                               |                         |
| DL-p-chlorophenylalanine (pCPA)                                        |                                                                                                            | Sigma-Aldrich                                            |                         |
| <b>Experimental Models: Organisms/Strains</b>                          |                                                                                                            |                                                          |                         |
| +/+                                                                    | <i>Canton-Sw1118</i> (isoCJ1)                                                                              | (1)                                                      |                         |
| <i>tub-Gal80<sup>S</sup></i>                                           | <i>P{tubP-GAL80<sup>S</sup>}20</i> on Chr 2; <i>P{tubP-GAL80<sup>S</sup>}2</i> on Chr 3                    | Bloomington <i>Drosophila</i> Stock Center               | RRID:BDSC: 7019, 7017   |
| <i>VT44966</i>                                                         | <i>P{VT44966-Gal4}attP2</i> on Chr 3                                                                       | Vienna <i>Drosophila</i> Resource Center                 | N/A                     |
| <i>VT30604</i>                                                         | <i>P{VT30604-Gal4}attP2</i> on Chr 3                                                                       | Vienna <i>Drosophila</i> Resource Center                 | N/A                     |
| <i>VT9843</i>                                                          | <i>P{VT9843-Gal4}attP2</i> on Chr 3                                                                        | Vienna <i>Drosophila</i> Resource Center                 | N/A                     |
| <i>VT26665</i>                                                         | <i>P{VT26665-Gal4}attP2</i> on Chr 3                                                                       | Vienna <i>Drosophila</i> Resource Center                 | N/A                     |
| <i>VT0110</i>                                                          | <i>P{VT0110-Gal4}attP2</i> on Chr 3                                                                        | Vienna <i>Drosophila</i> Resource Center                 | N/A                     |
| <i>OK107</i>                                                           | <i>P{GawB}OK107</i> on Chr 4                                                                               | Bloomington <i>Drosophila</i> Stock Center (2)           | RRID:BDSC: 854          |
| <i>c739</i>                                                            | <i>P{GawB}c739</i> on Chr 3                                                                                | Bloomington <i>Drosophila</i> Stock Center (2)           | RRID:BDSC: 7362         |
| <i>hs-Gal4</i>                                                         | N/A                                                                                                        | from Y. Zhong                                            | N/A                     |
| <i>GFP</i>                                                             | <i>P{UAS-mCD8::GFP}LL5</i> ,<br><i>P{UAS-mCD8::GFP}2</i> on Chr 2;<br><i>P{UAS-mCD8::GFPL}LL6</i> on Chr 3 | Bloomington <i>Drosophila</i> Stock Center               | RRID:BDSC: 5137; 5130   |
| <i>CREBB RNA interference</i>                                          | <i>P{TRiP.JF02494}attP2</i> on Chr 3                                                                       | Bloomington <i>Drosophila</i> Stock Center               | RRID:BDSC: 29322        |
| <i>CREBB RNA interference</i>                                          | <i>P{KK108927}VIE-260B</i> on Chr 2                                                                        | Vienna <i>Drosophila</i> Resource Center                 | RRID:VDRC: v101512      |
| <i>5-HT1A RNA interference</i>                                         | <i>P{TRiP.JF01852}attP2</i> on Chr 3                                                                       | Bloomington <i>Drosophila</i> Stock Center               | RRID:BDSC: 25834        |
| <i>5-HT1A RNA interference</i>                                         | on Chr 2 and 3                                                                                             | NIG-Fly Stock Center (8)                                 | RRID:NIG: 16720         |
| <i>crebB-aT7.1</i>                                                     | <i>P{UAS-CrebB-17A-a.cor}T7.1</i> on Chr 1                                                                 | (9)                                                      | RRID:BDSC: 9232         |
| <i>crebB-aT25.4</i>                                                    | <i>P{UAS-CrebB-17A-a.cor}T25.4</i> on Chr 1                                                                | (9)                                                      | RRID:BDSC: 9233         |
| <i>crebB-b</i>                                                         | <i>P{UAS-crebB-b}</i> on Chr 1                                                                             | (10)                                                     | N/A                     |
| <i>crebB-c</i>                                                         | <i>P{dCREB-B-UAS}88</i> on Chr 2;<br><i>P{dCREB-B-UAS}94</i> on Chr 3                                      | Bloomington <i>Drosophila</i> Stock Center (11)          | RRID:BDSC: 7220, 7219   |
| <i>5-HT1A</i>                                                          | <i>P{UAS-5-HT1A.R}2</i> on Chr 2; <i>P{UAS-5-HT1A.R}3</i> on Chr 2                                         | Bloomington <i>Drosophila</i> Stock Center               | RRID:BDSC: 27630, 27631 |
| <i>kaede</i>                                                           | <i>P{UAS-kaede}</i> on Chr 3                                                                               | (2)                                                      | N/A                     |

207 **SI Appendix References**

- 208 1. T. Tully, T. Preat, S. C. Boynton, M. Del Vecchio, Genetic dissection of consolidated  
209 memory in *Drosophila*. *Cell* 79, 35-47 (1994).
- 210 2. C. C. Chen et al., Visualizing long-term memory formation in two neurons of the  
211 *Drosophila* brain. *Science* 335, 678-685 (2012).
- 212 3. T. Tully, W. G. Quinn, Classical conditioning and retention in normal and mutant  
213 *Drosophila melanogaster*. *J Comp Physiol A* 157, 263-277 (1985).
- 214 4. T. P. Pai et al., *Drosophila* ORB protein in two mushroom body output neurons is  
215 necessary for long-term memory formation. *Proc Natl Acad Sci U S A* 110, 7898-7903  
216 (2013).
- 217 5. J. K. Wu et al., Long-term memory requires sequential protein synthesis in three subsets  
218 of mushroom body output neurons in *Drosophila*. *Sci Rep* 7, 7112 (2017).
- 219 6. R. Ando, H. Hama, M. Yamamoto-Hino, H. Mizuno, A. Miyawaki, An optical marker  
220 based on the UV-induced green-to-red photoconversion of a fluorescent protein. *Proc*  
221 *Natl Acad Sci U S A* 99, 12651-12656 (2002).
- 222 7. A. S. Chiang et al., Three-dimensional mapping of brain neuropils in the cockroach,  
223 *Diploptera punctata*. *J Comp Neurol* 440, 1-11 (2001).
- 224 8. P. T. Lee et al., Serotonin-mushroom body circuit modulating the formation of  
225 anesthesia-resistant memory in *Drosophila*. *Proc Natl Acad Sci U S A* 108, 13794-  
226 13799 (2011).
- 227 9. B. Perazzona, G. Isabel, T. Preat, R. L. Davis, The role of cAMP response element-  
228 binding protein in *Drosophila* long-term memory. *J Neurosci* 24, 8823-8828 (2004).
- 229 10. D. Yu, D. B. Akalal, R. L. Davis, *Drosophila* alpha/beta mushroom body neurons form  
230 a branch-specific, long-term cellular memory trace after spaced olfactory conditioning.

231 Neuron 52, 845-855 (2006).  
232 11. S. Eresh, J. Riese, D. B. Jackson, D. Bohmann, M. Bienz, A CREB-binding site as a  
233 target for decapentaplegic signaling during *Drosophila* endoderm induction. EMBO J  
234 16, 2014-2022 (1997).
